# Supplementary material
Source: publisher figshare collection journal article supplement (https://tandf.figshare.com/articles/dataset/_/2377207)
Supplement: Supplementary file 1 [file 1]

# Online Appendix: Combined Density Nowcasting in an Uncertain Economic Environment

Knut Are Aastveit\* Francesco Ravazzolo† Herman K van Dijk‡

December 30, 2015

The online appendix contains supplementary material. In the first section we document the estimation algorithm for our Combined Density Nowcasting (CDN) approach. In the next section we provide details on the data set that we use.

**JEL-codes:** C11, C13, C32, C53, E37

**Keywords:** Density forecast combination; Survey forecast; Bayesian filtering; Sequential Monte Carlo Nowcasting; Real-time data

---

\*Norges Bank, Knut-Are.Aastveit@norges-bank.no

†Norges Bank and BI Norwegian Business School, Francesco.Ravazzolo@norges-bank.no

‡Econometric Institute, Erasmus University Rotterdam, Econometrics Department VU University Amsterdam and Tinbergen Institute, hkvandijk@ese.eur.nl

# The Combined Density Nowcasting algorithm

The two stage-method of our CDN approach is given as:

**Stage 1:** Estimate  $K$  DFM models, generate draws for  $\tilde{F}_{k,t+h}$ ,  $k = 1, \dots, K$  and conditional on  $\tilde{F}_{k,t+h}$  generate the  $K$  vector of draws  $\tilde{y}_{t+h}$ .

**Stage 2:** Combine the predictions from the  $K$  models, accounting for uncertainty on the number of factors ( $K$ ) and information set ( $I_K$ ), using the convolution mechanism.

We elaborate briefly on each stage.

**On stage 1:** We follow the bootstrapping procedure in Aastveit et al. (2014) to construct simulated nowcasts. Let  $\hat{A}_0$ ,  $\hat{B}_0$ ,  $\hat{u}_{0,t_m^x}$ ,  $\hat{\xi}_{0,t_m^x}$ ,  $\hat{\Lambda}_0$ ,  $\hat{\alpha}_0$ ,  $\hat{\beta}_0$ , and  $\hat{e}_{0,t_m+h_m}$  denote the initial point estimates. Then, for  $d = 1, \dots, D$ :

1. Simulate monthly  $\tilde{F}_{t_m^x} = \hat{A}_0 \tilde{F}_{t_m^x-1} + \hat{B}_0 u_{t_m^x}^*$ , where  $u_{t_m^x}^*$  is re-sampled from  $\hat{u}_{0,t_m^x}$ .
2. Simulate  $\tilde{X}_{t_m^x} = \hat{\Lambda}_0 \tilde{F}_{t_m^x} + \xi_{t_m^x}^*$ , where  $\xi_{t_m^x}^*$  is re-sampled from  $\hat{\xi}_{0,t_m^x}$ .
3. Based on  $\tilde{X}_{t_m^x}$ , re-estimate the model to get a new set of parameter and factor estimates. Use these to generate factor nowcasts according to equation (9) in the main text, where shock uncertainty is included by re-sampling from  $\hat{u}_{0,t_m^x}$ .

Next, estimate equation (11) in the main text based on the monthly factor estimated in the previous step and converted to quarterly as described in the previous section, and construct nowcasts for  $\tilde{y}_{t+h}$  where shock uncertainty is included by re-sampling from  $\hat{e}_{0,t_m+h_m}$ .

**On stage 2:** Apply an extension of the parallelized version of the sequential Monte Carlo algorithm of Billio et al. (2013) and Casarin et al. (2015) to the case of Dynamic Factor Models. For a technical description of this algorithm, we refer the reader to Casarin et al. (2015). Here, we provide some details on the prior. The combination weights are  $[0,1]$ -valued processes and one can interpret them a sequence of prior probabilities over the set of models. In our framework, the prior probability on the set of models is random, as opposite to the standard model selection or BMA frameworks, where the model prior is fixed. The likelihood, given by the combination scheme, allows us to compute the posterior distribution on the model set.

In this sense the proposed combination scheme shares some similarities with the dilution and hierarchical model set prior distributions for BMA, proposed in George (2010) and Ley and Steel (2009) respectively. The learning strategy also plays a crucial role and we propose to use scores depending on the loss function of interest. In section 2.4 in the main text we describe our scores for nowcast evaluation and for each metric we apply the corresponding score in the learning mechanism in equation (6) in the main text.

We repeat steps 1-3 recursively for every block in each quarter vintage. The exercise is very time consuming and requires parallelization to be implemented. We parallelize the code in two directions. First, step 1 and step 2 are parallelized across models, vintages and blocks. Then, step 3 is parallelized across draws using the MATLAB toolbox DeCo described in Casarin et al. (2015).<sup>1</sup>

---

<sup>1</sup>If the user was in the last vintage and block, parallelization across models in steps 1 and 2 and parallelization across predictive draws in step 3 are required to derive predictive densities for future values.

# Data description

| Data Group | Description                                              | Transformation | Publication Lag | Start Vintage |
|------------|----------------------------------------------------------|----------------|-----------------|---------------|
| Hard       | Federal funds rate                                       | 1              | One month       | Last vintage  |
| Hard       | 3 month Treasury Bills                                   | 1              | One month       | Last vintage  |
| Hard       | 6 month Treasury Bills                                   | 1              | One month       | Last vintage  |
| Soft       | Spot USD/EUR                                             | 2              | One month       | Last vintage  |
| Soft       | Spot USD/JPY                                             | 2              | One month       | Last vintage  |
| Soft       | Spot USD/GBP                                             | 2              | One month       | Last vintage  |
| Soft       | Spot USD/CAD                                             | 2              | One month       | Last vintage  |
| Soft       | Price of gold on the London market                       | 2              | One month       | Last vintage  |
| Soft       | NYSE composite index                                     | 2              | One month       | Last vintage  |
| Soft       | Standard & Poors 500 composite index                     | 2              | One month       | Last vintage  |
| Soft       | Standard & Poors dividend yield                          | 2              | One month       | Last vintage  |
| Soft       | Standard & Poors P/E Ratio                               | 2              | One month       | Last vintage  |
| Soft       | Moodys AAA corporate bond yield                          | 1              | One month       | Last vintage  |
| Soft       | Moodys BBB corporate bond yield                          | 1              | One month       | Last vintage  |
| Soft       | WTI Crude oil spot price                                 | 2              | One month       | Last vintage  |
| Soft       | Purchasing Managers Index (PMI)                          | 1              | One month       | 03.03.1997    |
| Soft       | ISM mfg index, Production                                | 1              | One month       | 02.11.2009    |
| Soft       | ISM mfg index, Employment                                | 1              | One month       | 02.11.2009    |
| Soft       | ISM mfg index, New orders                                | 1              | One month       | 02.11.2009    |
| Soft       | ISM mfg index, Inventories                               | 1              | One month       | 02.11.2009    |
| Soft       | ISM mfg index, Supplier deliveries                       | 1              | One month       | 02.11.2009    |
| Hard       | Civilian Unemployment Rate                               | 1              | One month       | 05.01.1990    |
| Hard       | Civilian Participation Rate                              | 1              | One month       | 07.02.1997    |
| Hard       | Average (Mean) Duration of Unemployment                  | 2              | One month       | 05.01.1990    |
| Hard       | Civilians Unemployed - Less Than 5 Weeks                 | 2              | One month       | 05.01.1990    |
| Hard       | Civilians Unemployed for 5-14 Weeks                      | 2              | One month       | 05.01.1990    |
| Hard       | Civilians Unemployed for 15-26 Weeks                     | 2              | One month       | 05.01.1990    |
| Hard       | Civilians Unemployed for 27 Weeks and Over               | 2              | One month       | 05.01.1990    |
| Hard       | Employment on nonag payrolls: Total nonfarm              | 2              | One month       | 05.01.1990    |
| Hard       | Employment on nonag payrolls: Total Private Industries   | 2              | One month       | 05.01.1990    |
| Hard       | Employment on nonag payrolls: Goods-Producing Industries | 2              | One month       | 05.01.1990    |
| Hard       | Employment on nonag payrolls: Construction               | 2              | One month       | 05.01.1990    |
| Hard       | Employment on nonag payrolls: Durable goods              | 2              | One month       | 05.01.1990    |
| Hard       | Employment on nonag payrolls: Nondurable goods           | 2              | One month       | 05.01.1990    |
| Hard       | Employment on nonag payrolls: Manufacturing              | 2              | One month       | 05.01.1990    |
| Hard       | Employment on nonag payrolls: Mining and logging         | 2              | One month       | 05.01.1990    |

| Data Group | Description                                                               | Transformation | Publication Lag | Start Vintage |
|------------|---------------------------------------------------------------------------|----------------|-----------------|---------------|
| Hard       | Employment on nonag payrolls: Service-Providing Industries                | 2              | One month       | 05.01.1990    |
| Hard       | Employment on nonag payrolls: Financial Activities                        | 2              | One month       | 05.01.1990    |
| Hard       | Employment on nonag payrolls: Education & Health Services                 | 2              | One month       | 06.06.2003    |
| Hard       | Employment on nonag payrolls: Retail Trade                                | 2              | One month       | 05.01.1990    |
| Hard       | Employment on nonag payrolls: Wholesale Trade                             | 2              | One month       | 05.01.1990    |
| Hard       | Employment on nonag payrolls: Government                                  | 2              | One month       | 05.01.1990    |
| Hard       | Employment on nonag payrolls: Trade, Transportation & Utilities           | 2              | One month       | 05.01.1990    |
| Hard       | Employment on nonag payrolls: Leisure & Hospitality                       | 2              | One month       | 06.06.2003    |
| Hard       | Employment on nonag payrolls: Other Services                              | 2              | One month       | 05.01.1990    |
| Hard       | Employment on nonag payrolls: Professional & Business Services            | 2              | One month       | 06.06.2003    |
| Hard       | Average weekly hours of PNW: Total private                                | 2              | One month       | Last vintage  |
| Hard       | Average weekly overtime hours of PNW: Mfg                                 | 2              | One month       | Last vintage  |
| Hard       | Average weekly hours of PNW: Mfg                                          | 2              | One month       | Last vintage  |
| Hard       | Average hourly earnings:Construction                                      | 2              | One month       | Last vintage  |
| Hard       | Average hourly earnings: Mfg                                              | 2              | One month       | Last vintage  |
| Hard       | M1 Money Stock                                                            | 2              | One month       | 30.01.1990    |
| Hard       | M2 Money Stock                                                            | 2              | One month       | 30.01.1990    |
| Soft       | Consumer credit: New car loans at auto finance companies, loan-to-value   | 2              | Two months      | Last vintage  |
| Soft       | Consumer credit: New car loans at auto finance companies, amount financed | 2              | Two months      | Last vintage  |
| Hard       | Federal government total surplus or deficit                               | 2              | One month       | Last vintage  |
| Hard       | Exports of goods, total census basis                                      | 2              | Two months      | Last vintage  |
| Hard       | Imports of goods, total census basis                                      | 2              | Two months      | Last vintage  |
| Hard       | Industrial Production Index                                               | 2              | One month       | 17.01.1990    |
| Hard       | Industrial Production: Final Products (Market Group)                      | 2              | One month       | 14.12.2007    |
| Hard       | Industrial Production: Consumer Goods                                     | 2              | One month       | 14.12.2007    |
| Hard       | Industrial Production: Durable Consumer Goods                             | 2              | One month       | 14.12.2007    |
| Hard       | Industrial Production: Nondurable Consumer Goods                          | 2              | One month       | 14.12.2007    |
| Hard       | Industrial Production: Business Equipment                                 | 2              | One month       | 14.12.2007    |
| Hard       | Industrial Production: Materials                                          | 2              | One month       | 14.12.2007    |
| Hard       | Industrial Production: Durable Materials                                  | 2              | One month       | 14.12.2007    |
| Hard       | Industrial Production: nondurable Materials                               | 2              | One month       | 14.12.2007    |
| Hard       | Industrial Production: Manufacturing (NAICS)                              | 2              | One month       | 14.12.2007    |
| Hard       | Industrial Production: Durable Manufacturing (NAICS)                      | 2              | One month       | 14.12.2007    |
| Hard       | Industrial Production: Nondurable Manufacturing (NAICS)                   | 2              | One month       | 14.12.2007    |
| Hard       | Industrial Production: Mining                                             | 2              | One month       | 14.12.2007    |
| Hard       | Industrial Production: Electric and Gas Utilities                         | 2              | One month       | 14.12.2007    |
| Hard       | Capacity Utilization: Manufacturing (NAICS)                               | 1              | One month       | 05.12.2002    |
| Hard       | Capacity Utilization: Total Industry                                      | 1              | One month       | 15.11.1996    |
| Soft       | Housing starts: Total new privately owned housing units started           | 2              | One month       | 18.01.1990    |

| Data Group | Description                                                                  | Transformation | Publication Lag | Start Vintage |
|------------|------------------------------------------------------------------------------|----------------|-----------------|---------------|
| Soft       | New private housing units authorized by building permits                     | 2              | One month       | 17.08.1999    |
| Soft       | Philly Fed Business outlook survey, New orders                               | 1              | Current month   | Last vintage  |
| Soft       | Philly Fed Business outlook survey, General business activity                | 1              | Current month   | Last vintage  |
| Soft       | Philly Fed Business outlook survey, Shipments                                | 1              | Current month   | Last vintage  |
| Soft       | Philly Fed Business outlook survey, Inventories                              | 1              | Current month   | Last vintage  |
| Soft       | Philly Fed Business outlook survey, Unfilled orders                          | 1              | Current month   | Last vintage  |
| Soft       | Philly Fed Business outlook survey, Prices paid                              | 1              | Current month   | Last vintage  |
| Soft       | Philly Fed Business outlook survey, Prices received                          | 1              | Current month   | Last vintage  |
| Soft       | Philly Fed Business outlook survey, Number of employees                      | 1              | Current month   | Last vintage  |
| Soft       | Philly Fed Business outlook survey, Average workweek                         | 1              | Current month   | Last vintage  |
| Hard       | Producer Price Index: Finished Goods                                         | 2              | One month       | 12.01.1990    |
| Hard       | Producer Price Index: Finished Goods Less Food & Energy                      | 2              | One month       | 11.12.1996    |
| Hard       | Producer Price Index: Finished Consumer Goods                                | 2              | One month       | 11.12.1996    |
| Hard       | Producer Price Index: Intermediate Materials: Supplies & Components          | 2              | One month       | 12.01.1990    |
| Hard       | Producer Price Index: Crude Materials for Further Processing                 | 2              | One month       | 12.01.1990    |
| Hard       | Producer Price Index: Finished Goods Excluding Foods                         | 2              | One month       | 11.12.1996    |
| Hard       | Producer Price Index: Finished Goods Less Energy                             | 2              | One month       | 11.12.1996    |
| Hard       | Consumer Prices Index: All Items (urban)                                     | 2              | One month       | 18.01.1990    |
| Hard       | Consumer Prices Index: Food                                                  | 2              | One month       | 12.12.1996    |
| Hard       | Consumer Prices Index: Housing                                               | 2              | One month       | Last vintage  |
| Hard       | Consumer Prices Index: Apparel                                               | 2              | One month       | Last vintage  |
| Hard       | Consumer Prices Index: Transportation                                        | 2              | One month       | Last vintage  |
| Hard       | Consumer Prices Index: Medical care                                          | 2              | One month       | Last vintage  |
| Hard       | Consumer Prices Index: Commodities                                           | 2              | One month       | Last vintage  |
| Hard       | Consumer Prices Index: Durables                                              | 2              | One month       | Last vintage  |
| Hard       | Consumer Prices Index: Services                                              | 2              | One month       | Last vintage  |
| Hard       | Consumer Prices Index: All Items Less Food                                   | 2              | One month       | 12.12.1996    |
| Hard       | Consumer Prices Index: All Items Less Food & Energy                          | 2              | One month       | 12.12.1996    |
| Hard       | Consumer Prices Index: All items less shelter                                | 2              | One month       | Last vintage  |
| Hard       | Consumer Prices Index: All items less medical care                           | 2              | One month       | Last vintage  |
| Hard       | Real Gross Domestic Product                                                  | 2              | One quarter     | 28.01.1990    |
| Hard       | Real Disposable Personal Income                                              | 2              | One month       | 29.01.1990    |
| Hard       | Real Personal Consumption Expenditures                                       | 2              | One month       | 29.01.1990    |
| Hard       | Real Personal Consumption Expenditures: Durable Goods                        | 2              | One month       | 29.01.1990    |
| Hard       | Real Personal Consumption Expenditures: Nondurable Goods                     | 2              | One month       | 29.01.1990    |
| Hard       | Real Personal Consumption Expenditures: Services                             | 2              | One month       | 29.01.1990    |
| Hard       | Personal Consumption Expenditures: Chain-type Price Index                    | 2              | One month       | 01.08.2000    |
| Hard       | Personal Consumption Expenditures: Chain-Type Price Index Less Food & Energy | 2              | One month       | 01.08.2000    |
| Soft       | New one family houses sold                                                   | 2              | One month       | 30.07.1999    |

| Data Group | Description                                               | Transformation | Publication Lag | Start Vintage |
|------------|-----------------------------------------------------------|----------------|-----------------|---------------|
| Soft       | New home sales: Ratio of houses for sale to houses sold   | 2              | One month       | Last vintage  |
| Soft       | Existing home sales: Single-family and condos             | 2              | One month       | Last vintage  |
| Soft       | Chicago Fed MMI Survey                                    | 2              | One month       | Last vintage  |
| Soft       | Composite index of 10 leading indicators                  | 1              | One month       | Last vintage  |
| Soft       | Consumer confidence surveys: Index of consumer confidence | 1              | Current month   | Last vintage  |
| Soft       | Michigan Survey: Index of consumer sentiment              | 1              | Current month   | 31.07.1998    |
| Hard       | Average weekly initial claims                             | 2              | Current month   | Last vintage  |

*Note: In column 4, 1 denotes differencing to the initial series and 2 denotes log differencing to the initial series.*

## References

- Aastveit, K., K. Gerdrup, A. Jore, and L. Thorsrud (2014). Nowcasting GDP in real time: A density combination approach. *Journal of Business & Economic Statistics* 32(1), 48–68.
- Billio, M., R. Casarin, F. Ravazzolo, and H. K. van Dijk (2013). Time-varying combinations of predictive densities using nonlinear filtering. *Journal of Econometrics* 177(2), 213–232.
- Casarin, R., S. Grassi, F. Ravazzolo, and H. K. van Dijk (2015). Parallel sequential Monte Carlo for efficient density combination: The DeCo MATLAB toolbox. *Journal of Statistical Software* 68(3).
- George, E. I. (2010). Dilution priors: Compensating for model space redundancy. In J. O. Berger, T. T. Cai, and I. M. Johnstone (Eds.), *Borrowing Strength: Theory Powering Applications - A Festschrift for Lawrence D. Brown*, pp. 158–165. Beachwood, Ohio, USA: Institute of Mathematical Statistics.
- Ley, E. and M. F. J. Steel (2009). On the effect of prior assumptions in bayesian model averaging with applications to growth regression. *Journal of Applied Econometrics* 24(4), 651–674.
